# Supplementary material
Source: PubMed Central journal article supplement (PMC4064737)
Supplement: Supp_Fig1.pdf [file Supp_Fig1.pdf]

## Supplementary Data

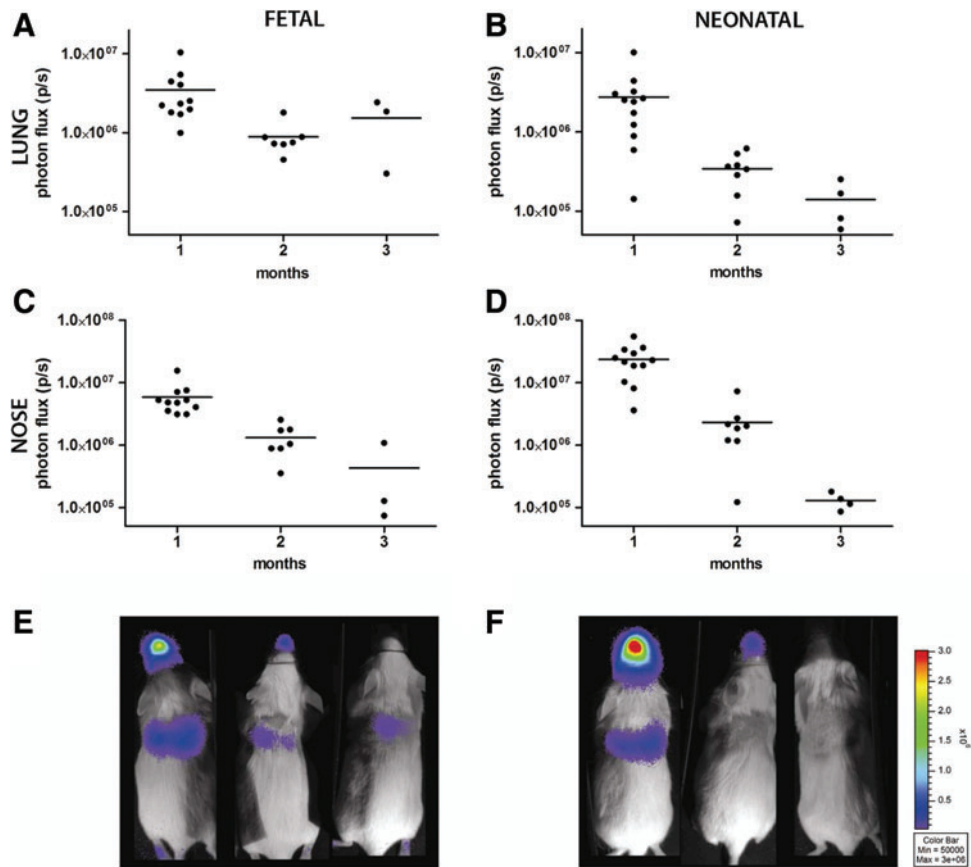

**SUPPLEMENTARY FIG. S1.** Bioluminescence imaging (BLI) of perinatal rAAV2/5-mediated gene transfer to murine airways. rAAV2/5-fLUC ( $1.5 \times 10^{10}$  GC/animal) and rAAV2/5- $\beta$ -Gal ( $1.0 \times 10^{10}$  GC/animal) were delivered to fetal mice on embryonic day 18 (E18) and to neonatal pups on day 3. Firefly luciferase (fLUC) expression was visualized (photos, *bottom*) and quantified (A–D) by BLI. The pseudocolor scale of bioluminescent images depicts the photon flux per second, per square centimeter per steradian ( $\text{p/sec/cm}^2/\text{sr}$ ). Total photon flux (p/sec) was quantified at various time points (1–3 months) for nose and lung. Measurements of individual animals were plotted as single values and the average BLI signal per group per time point is depicted. Animals were killed at each time point, explaining the reduction in number of experimental animals over time.
