# Supplementary material
Source: PubMed Central journal article supplement (PMC4064737)
Supplement: Supp_Fig4.pdf [file Supp_Fig4.pdf]

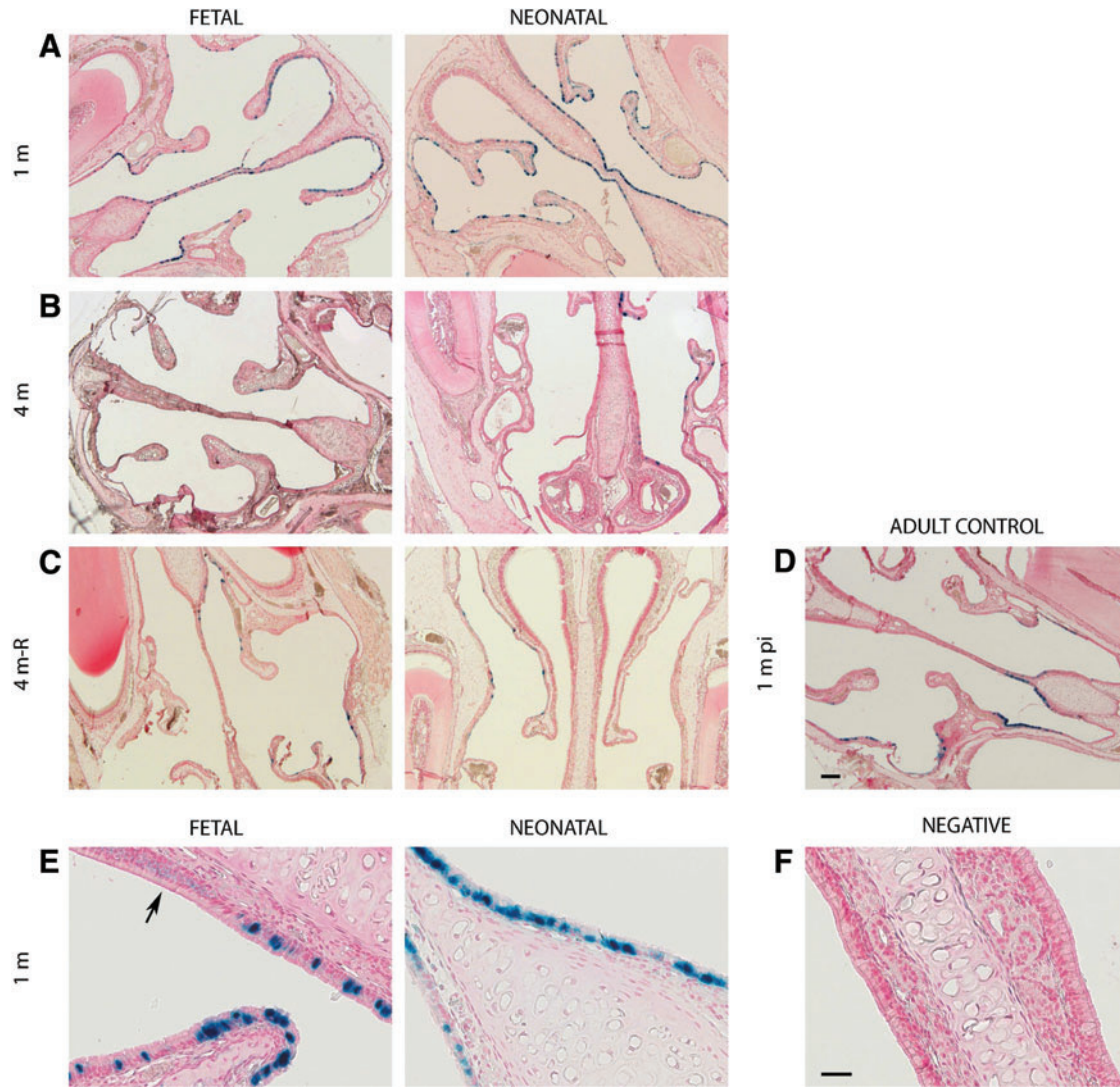

**SUPPLEMENTARY FIG. S4.** Evaluation of transgene expression in the nose after initial fetal and neonatal vector delivery and subsequent readministration in adult life. Shown is  $\beta$ -Gal expression in the upper airways (nose) as detected by X-Gal staining after fetal and neonatal rAAV2/5 administration ( $1.0 \times 10^{10}$  GC/animal) and readministration at 3 months. (A–D) Representative images depict the proximal nose region (original magnification,  $\times 63$ ) for each time point.  $\beta$ -Gal expression was visualized at 1 month (A) and 4 months (B) for animals receiving a single dose as fetus or neonate and at 4 months (or 1 month after readministration) for animals that received a second vector dose at 3 months (C). (D)  $\beta$ -Gal expression in nasal epithelium is demonstrated 1 month after intratracheal instillation of a single vector dose to adult control mice. (E) High-magnification images (original magnification,  $\times 400$ ) 1 month after fetal and neonatal gene transfer demonstrate  $\beta$ -Gal-positive cells situated mainly in the respiratory epithelium. Diffuse background staining is present in the olfactory epithelium (arrow). (F) Absence of X-Gal staining in negative control nose. Scale bars: (A–D)  $200 \mu\text{m}$ ; (E and F)  $50 \mu\text{m}$ . *Abbreviations:* 1 and 4 m, 1 and 4 months after perinatal gene transfer; 4 m-R, 1 month after readministration/4 months after initial perinatal gene transfer.
