# Supplementary material
Source: PubMed Central journal article supplement (PMC4064737)
Supplement: Supp_Fig7.pdf [file Supp_Fig7.pdf]

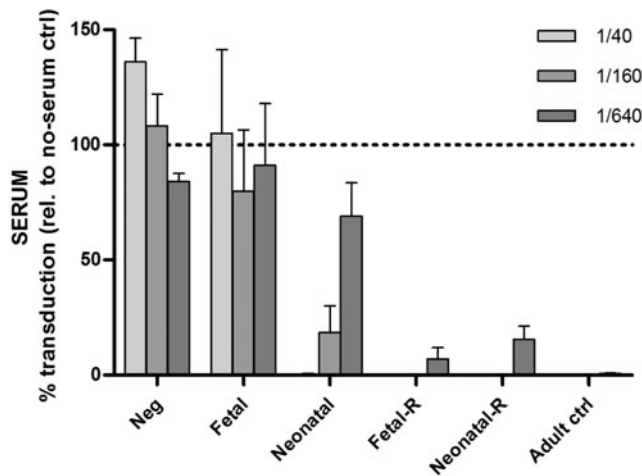

**SUPPLEMENTARY FIG. S7.** Analysis of nAb against the rAAV2/5 capsid before the second readministration. An rAAV transduction inhibition assay was performed to analyze nAb against the rAAV2/5 capsid in serum before the second readministration. Samples were analyzed 6 months after fetal or neonatal rAAV2/5 delivery (or 3 months after the first readministration). Serial dilutions of serum were incubated with rAAV2/5-fLUC and tested for inhibition of transduction in HEK293T cells. Transduction was quantified by measuring relative light units per microgram of protein and is expressed as mean percent transduction relative to no-serum control  $\pm$  SEM. The dashed line represents 100% transduction as measured by no-serum control. *Abbreviations:* fetal or neonatal, non-readministration controls 6 months after fetal or neonatal rAAV2/5 delivery; Fetal-R or Neonatal-R, a first readministration after fetal or neonatal vector delivery, serum collection 3 months later; Adult ctrl, adult controls that received a single vector dose, serum collection 1 month postinjection.
